# Supplementary material for: A small-molecule chemosensor for the selective detection of 2,4,6-trinitrophenol (TNP)
Source: Royal Society of Chemistry journal article supplement (doi:10.1039/c4ra07957d), 2014-10-09
Supplement: c4ra07957d1.pdf [file c4ra07957d1.pdf]

**Electronic Supplementary Information (ESI)**

# **A small-molecule chemosensor for the selective detection of 2,4,6-trinitrophenol (TNP)**

**Jianting Pan<sup>a</sup>, Fang Tang<sup>a</sup>, Aixiang Ding<sup>a</sup>, Lin Kong<sup>a\*</sup>, Longmei Yang<sup>a</sup>,**

**Xutang Tao<sup>b</sup>, Yupeng Tian<sup>a</sup>, Jiaxiang Yang<sup>a,b,\*</sup>**

| ENTRY | CONTENTS                                                                                                                                                                                                                                                                                                     | PAGE NO. |
|-------|--------------------------------------------------------------------------------------------------------------------------------------------------------------------------------------------------------------------------------------------------------------------------------------------------------------|----------|
| 1     | <b>Figure S1.</b> UV-Vis spectra of the probe <b>L</b> (10 $\mu$ M) upon addition of TNP in THF. The arrow indicate the change in the absorption intensity with the increased TNP concentration.                                                                                                             | S2       |
| 2     | <b>Figure S2.</b> Time resolved fluorescence emission spectra of compound <b>L</b> for different concentrations of TNP. $\lambda_{\text{ex}} = 350$ nm.                                                                                                                                                      | S2       |
| 3     | <b>Figure S3.</b> Job's plot of <b>L</b> with TNP shows 1:1 ratio.                                                                                                                                                                                                                                           | S2       |
| 4     | <b>Figure S4.</b> Stern-Volmer plot of ( $I_0/I-1$ ) values versus TNP concentrations in THF for <b>L</b> (10 $\mu$ M). $I_0$ = peak intensity at [TNP] = 0. $\lambda_{\text{ex}} = 350$ nm.                                                                                                                 | S2       |
| 5     | <b>Figure S5.</b> The fluorescence intensity at 440 nm as a function of TNP concentration.                                                                                                                                                                                                                   | S3       |
| 6     | <b>Figure S6.</b> The interference experiment for <b>L</b> (10 $\mu$ M) in THF with 5 equiv. of TNP in presence of other nitro aromatics in excess (10 equiv.).                                                                                                                                              | S3       |
| 7     | <b>Figure S7.</b> UV-Vis (a) and fluorescence (b) spectra of the probe <b>L</b> (10 $\mu$ M) upon addition of TNP in THF/H <sub>2</sub> O (1:9, v/v). The arrows indicate the changes in the absorption and fluorescence intensities with the increased TNP concentration ( $\lambda_{\text{ex}} = 400$ nm). | S3       |
| 8     | <b>Figure S8.</b> Comparison of fluorescence quenching of the probe <b>L</b> (10 $\mu$ M) in THF after the addition of 20 equiv. TNP at various excitation wavelengths.                                                                                                                                      | S4       |
| 9     | <b>Figure S9.</b> The whole <sup>1</sup> H NMR titration spectra (400 MHz) of the probe <b>L</b> with TFA (0, 0.5, 1.0, 2.0 equiv.) in DMSO- <i>d</i> <sub>6</sub> .                                                                                                                                         | S4       |
| 10    | <b>Figure S10.</b> <sup>1</sup> H NMR (DMSO- <i>d</i> <sub>6</sub> , 400 MHz) spectrum of compound <b>L</b> .                                                                                                                                                                                                | S4       |
| 11    | <b>Figure S11.</b> <sup>13</sup> C NMR (DMSO- <i>d</i> <sub>6</sub> , 100 MHz) spectrum of compound <b>L</b> .                                                                                                                                                                                               | S5       |
| 12    | <b>Table S1.</b> Hydrogen bond lengths (Å) and bond angles (°)                                                                                                                                                                                                                                               | S5       |

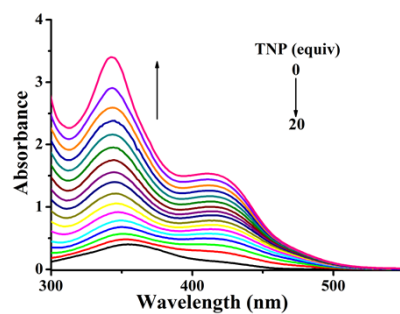

**Figure S1.** UV-Vis spectra of the probe **L** (10  $\mu$ M) upon addition of TNP in THF. The arrow indicate the change in the absorption intensity with the increased TNP concentration.

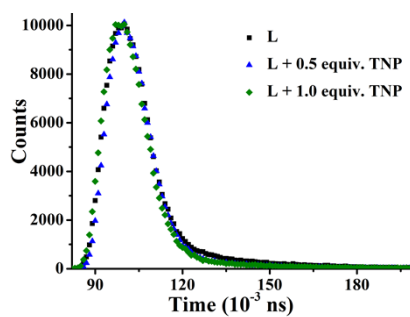

**Figure S2.** Time resolved fluorescence emission spectra of compound **L** for different concentrations of TNP.  $\lambda_{\text{ex}} = 350$  nm.

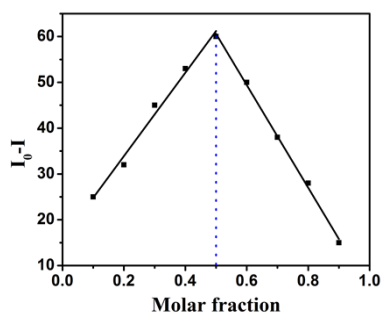

**Figure S3.** Job's plot of **L** with TNP shows 1:1 ratio.

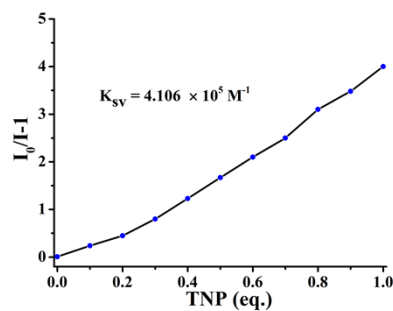

**Figure S4.** Stern-Volmer plot of ( $I_0/I-1$ ) values versus TNP concentrations in THF for **L** (10  $\mu$ M).  $I_0$ = peak intensity at [TNP] = 0.  $\lambda_{ex}$  = 350 nm.

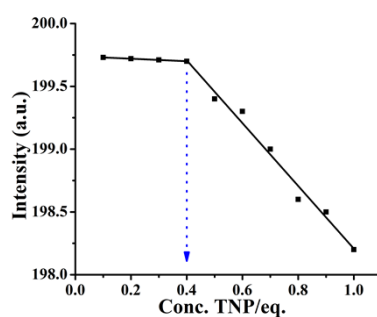

**Figure S5.** The fluorescence intensity at 440 nm as a function of TNP concentration.

Equation used for calculating detection limit (DL):  $DL = C_L \times E_T$

$C_L$  = Conc. of compound **L**;  $E_T$  = Conc. of titrant at which change observed.

Thus; detection limit for TNP:

$$DL = 1 \times 10^{-6} \times 0.4 \text{ equiv} = 4 \times 10^{-7} \text{ or } = 400 \text{ ppb}$$

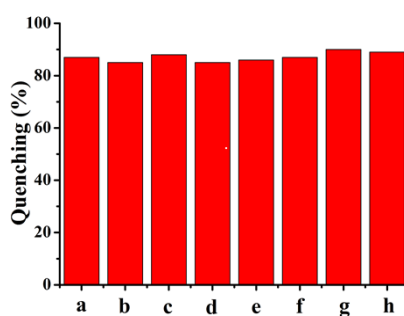

**Figure S6.** The interference experiment for **L** (10  $\mu$ M) in THF with 5 equiv. of TNP in presence of other nitro aromatics in excess (10 equiv.).

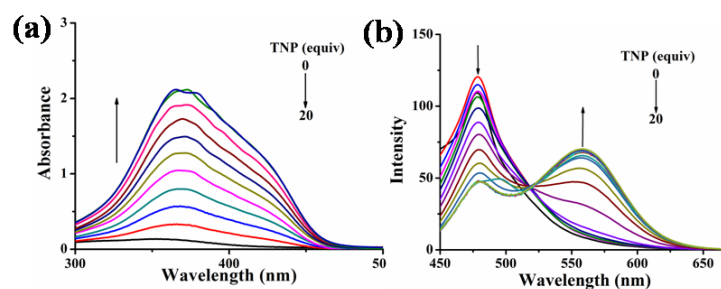

**Figure S7.** UV-Vis (a) and fluorescence (b) spectra of the probe **L** (10  $\mu$ M) upon addition of TNP in THF/H<sub>2</sub>O (1:9, v/v). The arrows indicate the changes in the absorption and fluorescence intensities with the increased TNP concentration ( $\lambda_{\text{ex}} = 400$  nm).

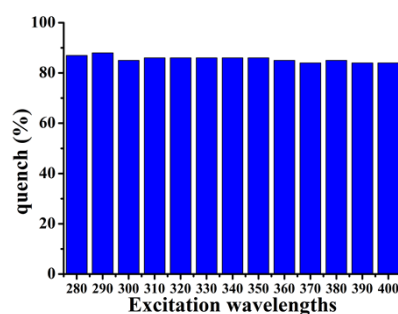

**Figure S8.** Comparison of fluorescence quenching of the probe **L** (10  $\mu$ M) in THF after the addition of 20 equiv. TNP at various excitation wavelengths.

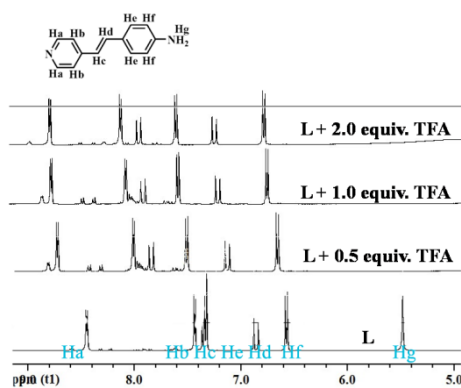

**Figure S9.** The whole <sup>1</sup>H NMR titration spectra (400 MHz) of the probe **L** with TFA (0, 0.5, 1.0, 2.0 equiv.) in DMSO-*d*<sub>6</sub>.

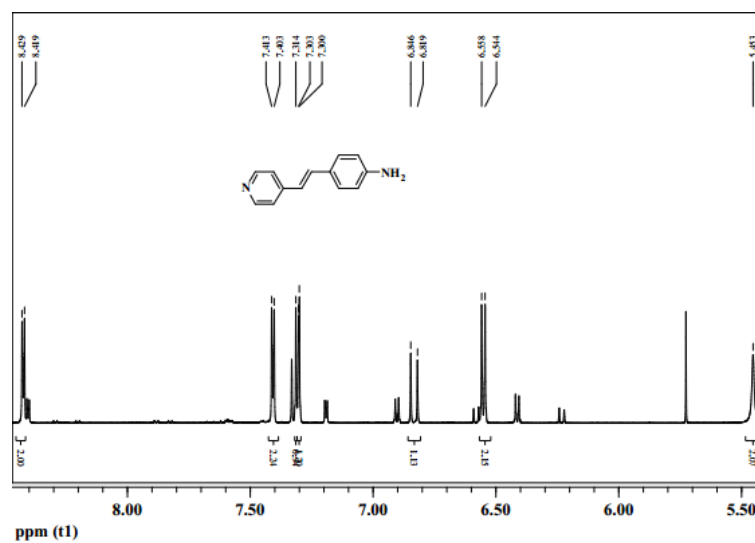

**Figure S10.**  $^1\text{H}$  NMR ( $\text{DMSO}-d_6$ , 400 MHz) spectrum of compound **L**.

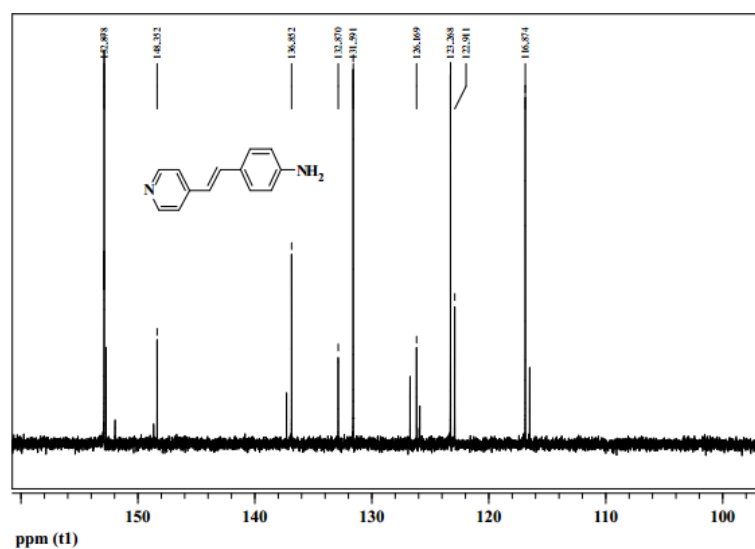

**Figure S11.**  $^{13}\text{C}$  NMR ( $\text{DMSO}-d_6$ , 100 MHz) spectrum of compound **L**.

**The hydrogen-bonds data of L·TNP.**

**Table S1.** Hydrogen bond lengths (Å) and bond angles (°)

| D–H...A            | d(D–H) | d(H...A) | d(D...A) | ∠DHA   |
|--------------------|--------|----------|----------|--------|
| C(9)–H(9)...N(5)   | 0.931  | 2.646    | 3.563(3) | 168.92 |
| N(5)–H(5B)...O(4)  | 0.860  | 2.446    | 3.158(5) | 140.65 |
| C(7)–H(7)...O(2)   | 0.931  | 2.475    | 3.217(3) | 136.77 |
| C(10)–H(10)...O(3) | 0.930  | 2.669    | 3.591(5) | 171.29 |
| N(4)–H(4A)...O(5)  | 0.859  | 2.277    | 2.791(5) | 118.53 |
| N(4)–H(4A)...O(7)  | 0.859  | 1.968    | 2.763(3) | 153.28 |
| N(5)–H(5A)...O(1)  | 0.860  | 2.265    | 3.080(3) | 158.32 |
| C(4)–H(4)...O(3)   | 0.930  | 2.609    | 3.386(5) | 141.37 |
| C(13)–H(13)...O(6) | 0.931  | 2.614    | 3.486(5) | 156.24 |
